# Supplementary material
Source: PubMed Central journal article supplement (PMC5915790)
Supplement: JB.00051-18_zjb999094736s1.pdf [file JB.00051-18_zjb999094736s1.pdf]

```

IutA   MSRRGFIRTAASVAALALTGSLVA[C]STDSASTS---ATTSAANKALTVFATTGYIGDAV
      : :||| |:||| .|... ..||| |...| :||| :||| :||| :||| :||| :||| :|||
IutE   -MAHRLIRTAIAAVAATGLVAA-AG[C]STTDSGTSASGTSSAAKSDLTKIFATTSYIGDAV

IutA   KNIAPDADVTIMVPGGDP[H]TYQPTTQDISKIESSDVVLWSGLHMEAKMLDQLKAQGDRQ
      ||| ||| ||| :||| ||| ||| ||| ||| ||| ||| ||| ||| ||| ||| ||| ||| ||| |||
IutE   KNIAPDADLTVMVPGGDP[H]TYQPSTADLEAMQNADAVIWSGLGMEANMIDQLRGLGDKQ

IutA   AAVAEAI PEDKRLDWPEPG-----DNGEKLYDP[H]VWNSTENWKY
      ||| :||| :||| :||| :||| :||| :||| :||| :||| :||| :||| :||| :|||
IutE   IAVAEQLPESQLLPWVEEDEHDDHGDAHEHGEGEDAHGHHHESQWDP[H]VWNSTDNWKL

IutA   VVDIAIAKKLSEVDKDNAATYKDNAEKYKKEIDETAAYVKEQIDQIPEQKRILITG[H]DAFS
      ||| |.||| |. | | | | | | | | | | | | | | | | | | | | | | | | | | | |
IutE   VVDQIVKKLSAADSANADTYKANGEKYNKQIDEAKAYVQAKIDTIPQDQRTLVSQ[H]DAFR

IutA   YFGKQFGVEIHATDFVTSESEMSPAELAE LGKFIAEKKIPTIFQDNLANPQAINSLKETV
      ||| ||| :||| :||| :||| :||| :||| :||| :||| :||| :||| :||| :||| :|||
IutE   YFGKQFGLEVKATDFVTSDAERSANELEDLATFIVEHHVPVIFQDASANPQAVKSLAENV

IutA   KAKGWNVEISDKELYADSLGESAPTD TYLGVLKYNADAIREALAK-
      || :||| :||| :||| :||| :||| :||| :||| :||| :||| :||| :||| :|||
IutE   AKKGGKVKVVDKELYSDSLGADAPADTYIGALKYNADTIAEAFSSTR

```

**Figure S1 Alignment of lutA and lutE.** Amino acid sequence alignment of lutA and lutE using ClustalO (1). The indicated Cys residue (red) is the predicted lipoprotein anchor and indicated His residues (yellow) are associated with metal ion coordination in crystalized homologues. Residues in **bold** indicate a region rich in acidic and His residues (His-rich region) that is associated with Zn-binding proteins of the cluster 9 family.

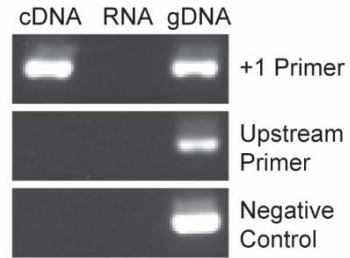

**Figure S2 PCR validation of *iutE* RACE.** Primers annealing at the +1 site (+1 Primer), -20 site (Upstream Primer), and further upstream (Negative Control) were paired with a common reverse primer to PCR amplify targets from total cDNA, total RNA, and genomic DNA (gDNA).

**Table S1. Primers used in this study for cloning.**

| Plasmid       | Primer sequence <sup>a</sup>                                        | RE    | Vector      |
|---------------|---------------------------------------------------------------------|-------|-------------|
| pKΔiut        | <u>GTATTGGGTGTGCATGCGTCCGC</u> <sup>b</sup>                         | SphI  | pK18mobsacB |
|               | <u>TTACTTAGCCAAAGCCTCGCGTCTAGACATGCGAGAAGTTTCCTTAG</u> <sup>b</sup> | XbaI  |             |
|               | <u>GTGGCGGTCATGGCACATCTAGAGGAGGCTTTCTCCTCGACCC</u> <sup>c</sup>     | XbaI  |             |
|               | <u>GCGCCAATGGGAATTCCGCGTCAGC</u> <sup>c</sup>                       | EcoRI |             |
| pKΔripA.      | <u>GATCGGATCCCATAGCCCAATCGGCAGAG</u> <sup>d</sup>                   | BamHI | pK19mobsacB |
|               | <u>AAGACTCACGAGCCGAAACC</u> <sup>d</sup>                            |       |             |
|               | <u>GGTTTCGGCTCGTGAGTCTTTGGTTCTTCTGTGTAAGTTGAT</u> <sup>e</sup>      |       |             |
|               | <u>GATCGTCCGACCGGAGTACAGACCTAGGTTG</u> <sup>e</sup>                 | Sall  |             |
| plutAHis.     | <u>CCGCTACCA<del>CC</del>ATGGCAGCTAACAAAGC</u>                      | NcoI  | pET30a      |
|               | <u>CAGATGTGCGACAGGATCCGCGCTAC</u>                                   | BamHI |             |
| plutEHis.     | <u>CTTCGAGCGCCGTCATGAGCGCACTC</u>                                   | BspHI | pET30a      |
|               | <u>CTCTTCGTGAGCGCCGCGAGCCACC</u>                                    | NotI  |             |
| pSPZ-iutA     | <u>TGAAGCCGGATCCTGACATGCG</u>                                       | BamHI | pSPZ        |
|               | <u>TATCTGAAGTCGACAGCGGCAT</u>                                       | Sall  |             |
| pSPZ-iutE(FL) | <u>GATCGGATCCACAAGACCTGTGGCAGCCA</u>                                | BamHI | pSPZ        |
|               | <u>GCTCAGATCTGCTGTTGCGTTGATGATTGTGC</u> <sup>f</sup>                |       |             |
| pSPZ-iutE     | <u>CGGCTGGATCCACAAGACCTGTG</u>                                      | BamHI | pSPZ        |
|               | <u>AGACCTGTGGGATCCACAGCTGC</u>                                      | Sall  |             |
| pSPZ-iutE5'   | <u>CGTCGGATCCTCATGTGCACTAGGAAGCGC</u>                               | BamHI | pSPZ        |
|               | <u>GCTCAGATCTGCTGTTGCGTTGATGATTGTGC</u> <sup>f</sup>                |       |             |
| pET30zur      | <u>GGCCATGGCCATGAATCGCACCATTG</u>                                   | NcoI  | pET30a      |
|               | <u>GCGTTTGGATCCGCGCTCGGAT</u>                                       | BamHI |             |
| pET30ripA     | <u>GCCCAGATCTAAGTCTCCATCAATTAAGACGACC</u>                           | BglII | pET30a      |
|               | <u>ATTCCGATCCTTACAGAAGGAACCAACACC</u>                               | BamHI |             |

<sup>a</sup> Primer sequences are oriented 5' to 3'. Restriction enzyme (RE) sites used are underlined.

<sup>b-e</sup> Indicated primers were paired for PCR amplification.

<sup>f</sup> No restriction site is indicated. A native Sall site in the *Corynebacterium diphtheriae* genomic sequence was used for cloning.

**Table S2. Primers used in this study for qPCR.**

| Primer      | Gene           | Primer sequence (5'-3') | Amplicon size (bp) |
|-------------|----------------|-------------------------|--------------------|
| RTiutA1     | <i>iutA</i>    | ACGAGACTGCTGCGTATGTG    | 222                |
| RTiutA2     |                | TGTCCTGGAAAATCGTAGGG    |                    |
| RTiutD1     | <i>iutD</i>    | TCGTGATTTCTGAGCACAC     | 182                |
| RTiutD2     |                | ACACCATCGTCATCACCAGA    |                    |
| RTiutE1.1   | <i>iutE</i>    | ACCACGTCCCAGTGATCTTC    | 171                |
| RTiutE2.1   |                | ACTTCAGGGCACCGATGTAG    |                    |
| RTgyrB1     | <i>dip0005</i> | GGTCTGACCATTACGCTGGT    | 166                |
| RTgyrB2     |                | TCTTCTCGCGTTTTCTTTGGT   |                    |
| RTDIP0168_1 | <i>dip0168</i> | AAAGTTGAGTCCGGAGCGTA    | 179                |
| RTDIP0168_2 |                | AACTCATCGACCCCAACAAC    |                    |
| RTripA1     | <i>dip0922</i> | GGAAGGTTGCTCAGAAGCTG    | 174                |
| RTripA2     |                | ATAAATCAGCCGCCACAGAC    |                    |
| RTDIP1283_1 | <i>acn</i>     | TCCTACTCCAGAGGGCAAGA    | 190                |
| RTDIP1283_2 |                | ACCAGGTTTGATGGACGAAG    |                    |

**Table S3. Primers for 5'RACE and PCR validation.**

| Target Gene    | Purpose          | Primer Sequence (5'-3') | Notes        |
|----------------|------------------|-------------------------|--------------|
| RACE           |                  |                         |              |
| <i>iutA</i>    | GSP1             | CATTATCGCCTGGCTCTGG     |              |
|                | GSP2             | CATCTTGGCCTCCATATGCAG   |              |
| <i>iutE</i>    | GSP1             | GGAGAGCTTCTTAACGATCTG   |              |
|                | GSP2             | AACCCATGGCAACAGCTGG     |              |
| PCR validation |                  |                         |              |
| <i>iutE</i>    | +1               | ATGGCACATCGACTAATCCGTA  | <sup>a</sup> |
|                | Upstream         | GTTGCCTATAGTGGCGGTC     | <sup>a</sup> |
|                | Negative control | GGCTGCGGTGTTAAAACTGC    | <sup>a</sup> |
|                | Reverse primer   | GAGGATCCCACTGCGACTC     |              |

<sup>a</sup> Indicated forward primers were paired with the reverse primer for PCR.

**Table S4. Primers used in this study for EMSA.**

| Region name     | Amplicon size <sup>a</sup> | Primer sequence (5'-3') <sup>b</sup> | Notes |
|-----------------|----------------------------|--------------------------------------|-------|
| <i>ptox</i>     | 232                        | CCCCCCTCATTGAGGAGTAGGTCCC            |       |
|                 |                            | CCCCCCCATGGGCTGAAGGTGGGG             |       |
| <i>piutA</i>    | 187                        | CCCCCAGCGGCATGGTTCTTATTGTG           |       |
|                 |                            | CCCCCCTGACATGCGAGAAGTTTCCTTAG        |       |
| <i>piutE-FL</i> | 206                        | CCCCCGTCGACGGCCTCATCTTTC             |       |
|                 |                            | CCCCCACAAGACCTGTGGCAGCCA             | c     |
| <i>piutE</i>    | 153                        | CCCCCGGCTGCGGTGTAAAAAC               | d     |
|                 |                            | CCCCCACAAGACCTGTGGCAGCCA             | c     |
| <i>piutE A</i>  | 94                         | CCCCCGGCTGCGGTGTAAAAAC               | d     |
|                 |                            | CCCCCGCCACTATAGGCAACGATTGT           |       |
| <i>piutE B</i>  | 91                         | CCCCCAGTGACATGACAATCGTTGC            |       |
|                 |                            | CCCCCACAAGACCTGTGGCAGCCA             | c     |
| <i>piutE C</i>  | 63                         | CCCCCGGCTGCGGTGTAAAAAC               | d     |
|                 |                            | CCCCCAGGAAGCGCACACTTAGATAC           |       |
| <i>pacn</i>     | 400                        | CCCCCCTTGGCCAATCACCATTCCATA          |       |
|                 |                            | CCCCCAGTGAGCTCCACTTCGTTTTG           |       |

<sup>a</sup> Sizes include what is amplified from genomic template, a string of six C residues are added to the 5' end of each primer to assist in stability of the double-stranded product.

<sup>b</sup> All primers are biotinylated on the 5' end.

<sup>c</sup> Primers used to amplify these constructs are shared among indicated constructs.

<sup>d</sup> Primers used to amplify these constructs are shared among indicated constructs.

## Supplemental References

1. **Sievers F, Wilm A, Dineen D, Gibson TJ, Karplus K, Li W, Lopez R, McWilliam H, Remmert M, Soding J, Thompson JD, Higgins DG.** 2011. Fast, scalable generation of high-quality protein multiple sequence alignments using Clustal Omega. *Mol Syst Biol* **7**:539.
